# Supplementary material for: Association of a Multimodal Educational Intervention for Primary Care Physicians With Prescriptions of Buprenorphine for Opioid Use Disorders
Source: PubMed Central journal article supplement (PMC6820030; doi:10.1001/jamanetworkopen.2019.13818), 2019-10-23
Supplement: jamanetwopen-2-e1913818-s001.pdf [file jamanetwopen-2-e1913818-s001.pdf]

## Supplementary Online Content

Clark B, Kai M, Dix R, et al. Association of a multimodal educational intervention for primary care physicians with prescriptions of buprenorphine for opioid use disorders. *JAMA Netw Open*. 2019;2(10):e1913818. doi:10.1001/jamanetworkopen.2019.13818

**eTable 1.** List of Diagnoses Used to Define Opioid Use Disorder

**eFigure.** Uptake vs Nonuptake Primary Care Providers (PCPs) and Receipt of Medication for Opioid Use Disorder (MOUD)

**eTable 2.** Initial Physician Survey

**eTable 3.** Physician Survey Results

**eAppendix.** Intervention Educational Video

This supplementary material has been provided by the authors to give readers additional information about their work.

**eTable 1. List of Diagnoses Used to Define Opioid Use Disorder\*:**

| ICD Code | Description                                                      |
|----------|------------------------------------------------------------------|
| F1110    | Opioid abuse, uncomplicated                                      |
| F11129   | Opioid abuse with intoxication, unspecified                      |
| F11188   | Opioid abuse with other opioid-induced disorder                  |
| F1119    | Opioid abuse with unspecified opioid-induced disorder            |
| F1120    | Opioid dependence, uncomplicated                                 |
| F1121    | Opioid dependence, in remission                                  |
| F11220   | Opioid dependence with intoxication, uncomplicated               |
| F1123    | Opioid dependence with withdrawal                                |
| F1124    | Opioid dependence with opioid-induced mood disorder              |
| F11282   | Opioid dependence with opioid-induced sleep disorder             |
| F11288   | Opioid dependence with other opioid-induced disorder             |
| F1129    | Opioid dependence with unspecified opioid-induced disorder       |
| F1190    | Opioid use, unspecified, uncomplicated                           |
| F11921   | Opioid use, unspecified with intoxication delirium               |
| F1193    | Opioid use, unspecified with withdrawal                          |
| F11982   | Opioid use, unspecified with opioid-induced sleep disorder       |
| F11988   | Opioid use, unspecified with other opioid-induced disorder       |
| F1199    | Opioid use, unspecified with unspecified opioid-induced disorder |

\*We included multiple related ICD10 codes to broadly capture patients with OUD.

**eFigure.** Uptake vs Nonuptake Primary Care Providers (PCPs) and Receipt of Medication for Opioid Use Disorder (MOUD)

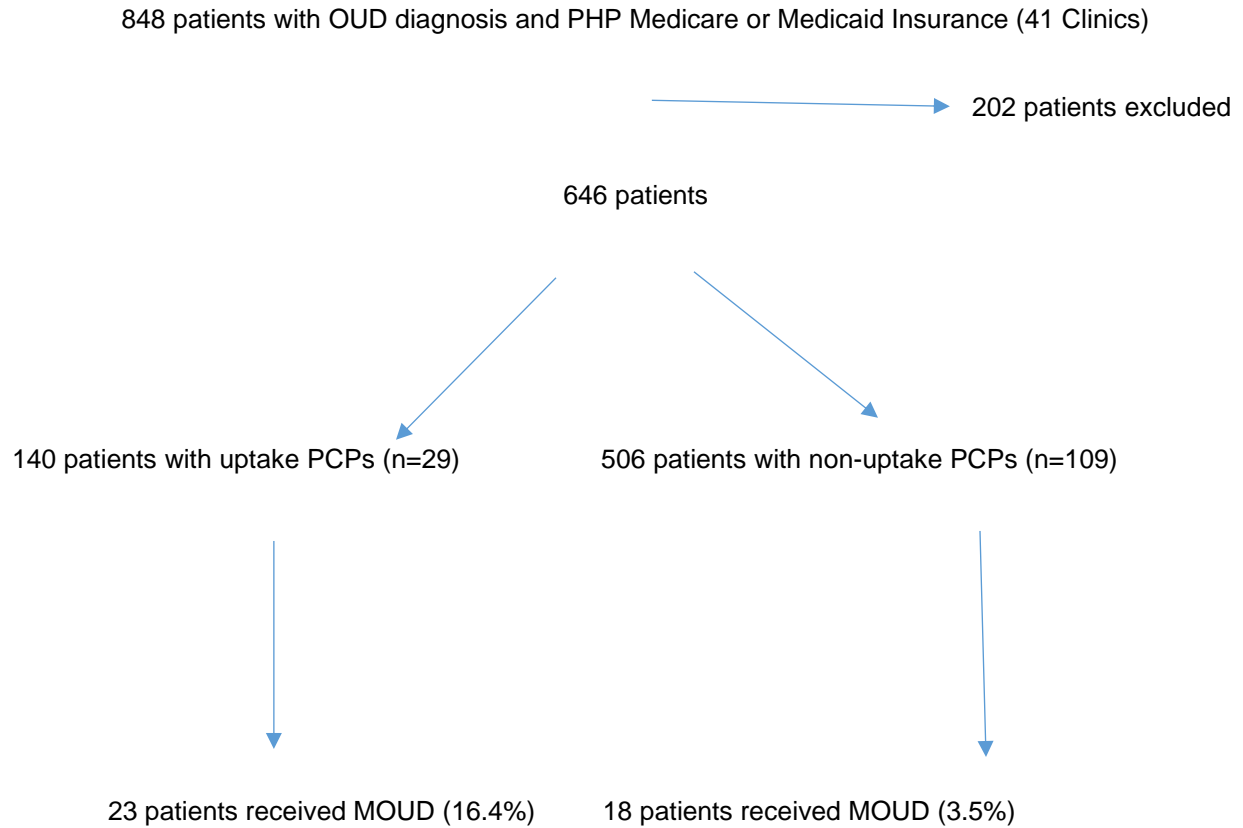

**eTable 2. Initial Physician Survey**

1. Do you know what Buprenorphine (Suboxone) is? Y or N
2. Do you personally think Buprenorphine should be provided for patients in primary care? Y or N?
3. Do you currently have the Buprenorphine DEA waiver to treat opiate addicted patients? Y or N?
4. Are you currently treating patients with Buprenorphine? Y or N?

4a. If yes, approximately how many? \_\_\_\_\_patients

4b. If no, how likely are you to incorporate Buprenorphine prescribing into your personal practice?

|               |          |                   |           |                 |        |             |
|---------------|----------|-------------------|-----------|-----------------|--------|-------------|
| Very Unlikely | Unlikely | Somewhat Unlikely | Undecided | Somewhat Likely | Likely | Very Likely |
| 1             | 2        | 3                 | 4         | 5               | 6      | 7           |

5. Please rank the top 3 barriers you have to prescribing Buprenorphine

|                                                                                          |  |
|------------------------------------------------------------------------------------------|--|
| Concerns about effectiveness of Buprenorphine                                            |  |
| Difficult to titrate                                                                     |  |
| Adverse events                                                                           |  |
| Medical complications                                                                    |  |
| Concerns about diversion and abuse                                                       |  |
| Challenging patient population                                                           |  |
| Limited behavioral medicine support                                                      |  |
| Limited pharmacy support                                                                 |  |
| Limited outpatient counseling options for substance use and/or psychiatric comorbidities |  |
| Record-keeping requirement                                                               |  |
| DEA involvement                                                                          |  |
| Reimbursement concerns                                                                   |  |
| Time it takes to manage                                                                  |  |
| Federal limits on number of patients                                                     |  |
| Low demand                                                                               |  |
| Insufficient personal knowledge about prescribing Buprenorphine                          |  |
| Other (please list)                                                                      |  |

**eTable 3.** Physician Survey Results

|                                                                                           | N (out of 102) | %   |
|-------------------------------------------------------------------------------------------|----------------|-----|
| Challenging patient population                                                            | 54             | 52% |
| Limited outpatient counseling options for substance use and/or psychiatric co-morbidities | 52             | 51% |
| Time it takes to manage                                                                   | 31             | 30% |
| Insufficient personal knowledge about prescribing buprenorphine                           | 29             | 28% |
| Concerns about diversions and abuse                                                       | 23             | 23% |
| Limited behavioral medicine support                                                       | 17             | 17% |
| Low Demand                                                                                | 11             | 11% |
| Adverse events                                                                            | 6              | 6%  |
| Medical Complications                                                                     | 5              | 5%  |
| DEA Involvement                                                                           | 5              | 5%  |
| Concerns about effectiveness of buprenorphine                                             | 4              | 4%  |
| Limited pharmacy support                                                                  | 4              | 4%  |
| Record-keeping requirement                                                                | 3              | 3%  |
| Difficult to titrate                                                                      | 2              | 2%  |
| Federal limits on number of patients                                                      | 1              | 1%  |
| Reimbursement concerns                                                                    | 0              | 0%  |

## **eAppendix.** Intervention Educational Video

Link: <https://youtu.be/OBHAgLIMlc4>

Practitioner educational video highlights the experience of the physician champions in treating OUD in the primary care setting. Topics covered include the pharmacologic mechanisms of buprenorphine, the advantages of treating patients with OUD in the primary care setting, visit structure and success stories of patients with OUD treated by the physician champions.
